# Supplementary material
Source: PubMed Central journal article supplement (PMC6615694)
Supplement: supp_RA119.007454_143001_2_supp_334477_prtb6b.pdf [file supp_RA119.007454_143001_2_supp_334477_prtb6b.pdf]

## **Supporting Information**

### **A flap motif in human serine hydroxymethyl transferase is important for structural stabilization, ligand binding, and control of product release**

Sakunrat Ubonprasert<sup>1</sup>, Juthamas Jaroensuk<sup>2</sup>, Wichai Pornthanakasem<sup>3</sup>, Nuntaporn Kamonsutthipaijit<sup>4</sup>, Peerapong Wongpituk<sup>5</sup>, Pitchayathida Mee-udorn<sup>6</sup>, Thanyada Rungrotmongkol<sup>6,7</sup>, Onuma Ketchart<sup>8</sup>, Penchit Chitnumsub<sup>3</sup>, Ubolsree Leartsakulpanich<sup>3</sup>, Pimchai Chaiyen<sup>1,2</sup>, Somchart Maenpuen<sup>9\*</sup>

<sup>1</sup>Department of Biochemistry and Center for Excellence in Protein and Enzyme Technology, Faculty of Science, Mahidol University, Bangkok 10400, Thailand

<sup>2</sup>School of Biomolecular Science & Engineering, Vidyasirimedhi Institute of Science and Technology (VISTEC), Rayong 21210, Thailand

<sup>3</sup>Biomolecular Analysis and Application Laboratory, National Center for Genetic Engineering and Biotechnology (BIOTEC), National Science and Technology Development Agency, Pathumthani 12120, Thailand

<sup>4</sup>Synchrotron Light Research Institute (Public Organisation), Nakhon Ratchasima 30000, Thailand

<sup>5</sup>Center of Excellence in Computational Chemistry (CECC), Department of Chemistry, Faculty of Science, Chulalongkorn University, Bangkok 10330, Thailand

<sup>6</sup>Bioinformatics and Computational Biology Program, Graduate School, Chulalongkorn University, Bangkok 10330, Thailand

<sup>7</sup>Biocatalyst and Environmental Biotechnology Research Unit, Department of Biochemistry, Faculty of Science, Chulalongkorn University, Bangkok 10330, Thailand

<sup>8</sup>National Nanotechnology Center (NANOTEC), National Science and Technology Development Agency, Pathumthani 12120, Thailand

<sup>9</sup>Department of Biochemistry, Faculty of Science, Burapha University, Chonburi 20131, Thailand

#### **List of Supplemental Materials**

1. Supplemental table: 1
2. Supplemental figures with legends: 7
3. Supplemental MD movies with legends: 4

**1. Supplemental table**

**Table S1.** Summary of the purification of the recombinant hcSHMT/ $\Delta$ flap.<sup>a</sup>

| Purification step                                            | Volume (mL) | Total protein (mg) | Total activity (unit) | Specific activity (unit/mg) | Purification fold |
|--------------------------------------------------------------|-------------|--------------------|-----------------------|-----------------------------|-------------------|
| Crude extract                                                | 198         | 16,707             | 9,003                 | 0.54                        | 1                 |
| 1% (w/v) PEI                                                 | 170         | 7,786              | 6,028                 | 0.77                        | 1.43              |
| 30-50% (w/v) (NH <sub>4</sub> ) <sub>2</sub> SO <sub>4</sub> | 80          | 6,410              | 4,652                 | 0.73                        | 1.35              |
| DEAE-Sepharose                                               | 12.5        | 2,016              | 3,906                 | 1.94                        | 3.59              |
| Sephacryl S-200                                              | 17          | 1,775              | 7,548 <sup>b</sup>    | 4.25 <sup>b</sup>           | 7.87              |

<sup>a</sup>This purification table is from 7.8 liters culture.

<sup>b</sup>This fraction was assayed after addition and removal of excess free PLP, respectively.

## 2. Supplemental figures with legends

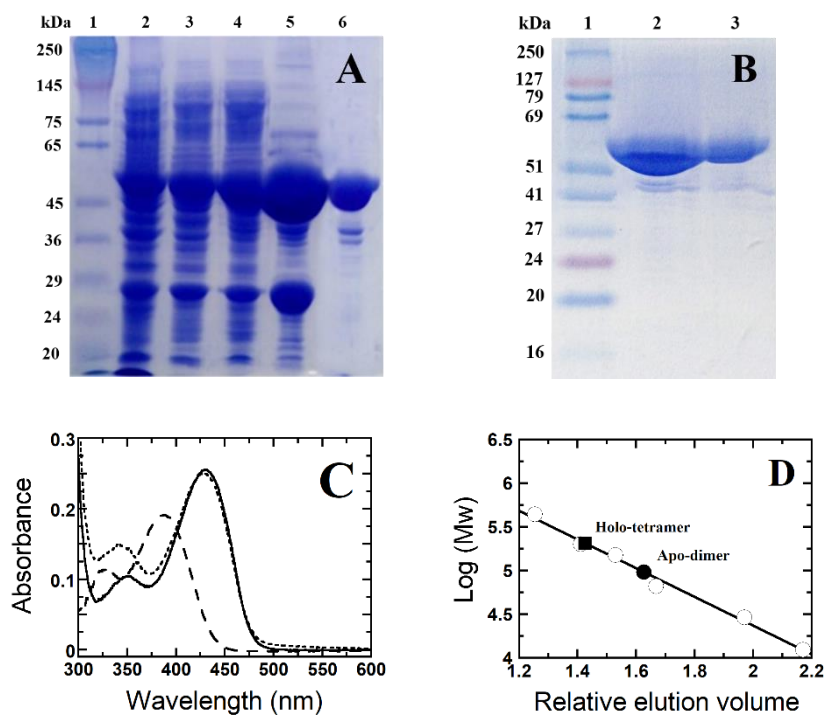

**Figure S1. Characterization of the purified hcSHMT/Δflap.** (A) 12% (w/v) SDS-PAGE analysis. Lane 1, AccuProtein markers (Enzmart Biotech); lane 2, crude extract; lane 3, extract after precipitation by 1% (w/v) polyethyleneimine; lane 4, after fractionation by 30-50% (w/v) ammonium sulfate; lane 5, after purification on a DEAE-Sepharose column; and lane 6, after purification on a Sephacryl S-200 column, respectively. The MW of the hcSHMT/Δflap monomer is approximately 52 kDa, consistent with the calculated MW. (B) 12% (w/v) SDS-PAGE analysis of the holo-tetramer (lane 2) and apo-dimer (lane 3) fractionated by SEC. (C) The overlaid absorption spectra of the hcSHMT/Δflap (solid line) and wild-type (dotted line) with maximum absorption at 430 nm, and the spectrum of free PLP (dashed line) with maximum absorption at 388 nm. (D) A calibration curve plot of the log MW of standard proteins (ferritin 440 kDa, β-amylase 200 kDa, alcohol dehydrogenase 150 kDa, bovine serum albumin 66 kDa and carbonic anhydrase 29 kDa, cytochrome c 12.4 kDa) *versus* relative elution volume. The native MW of holo-tetramer and apo-dimer are 206 and 96 kDa, respectively.

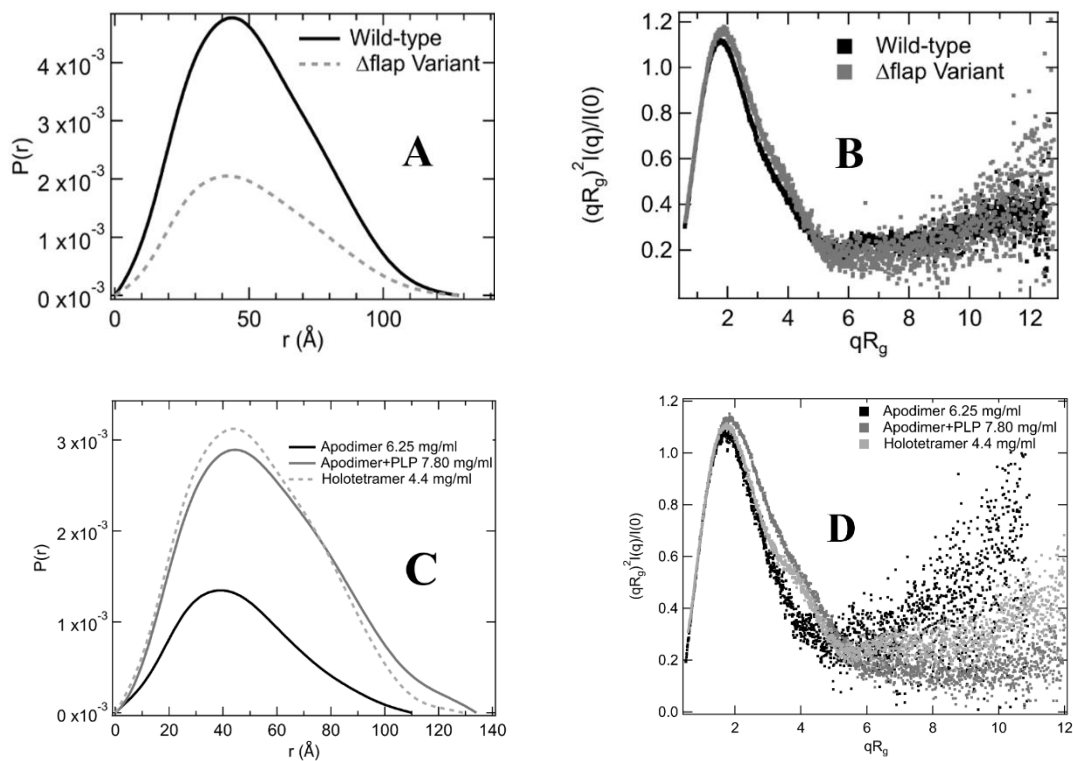

**Figure S2. Pair distribution function (P(r)) and Kratky analyses.** (A) Pair distribution function (P(r)) and (B) Kratky analysis of the hcSHMT/ $\Delta$ flap compared with those of the wild-type. (C) P(r) and (D) Kratky analysis of the apo-dimer, PLP-reconstituted apo-dimer and holo-tetramer of hcSHMT/ $\Delta$ flap.

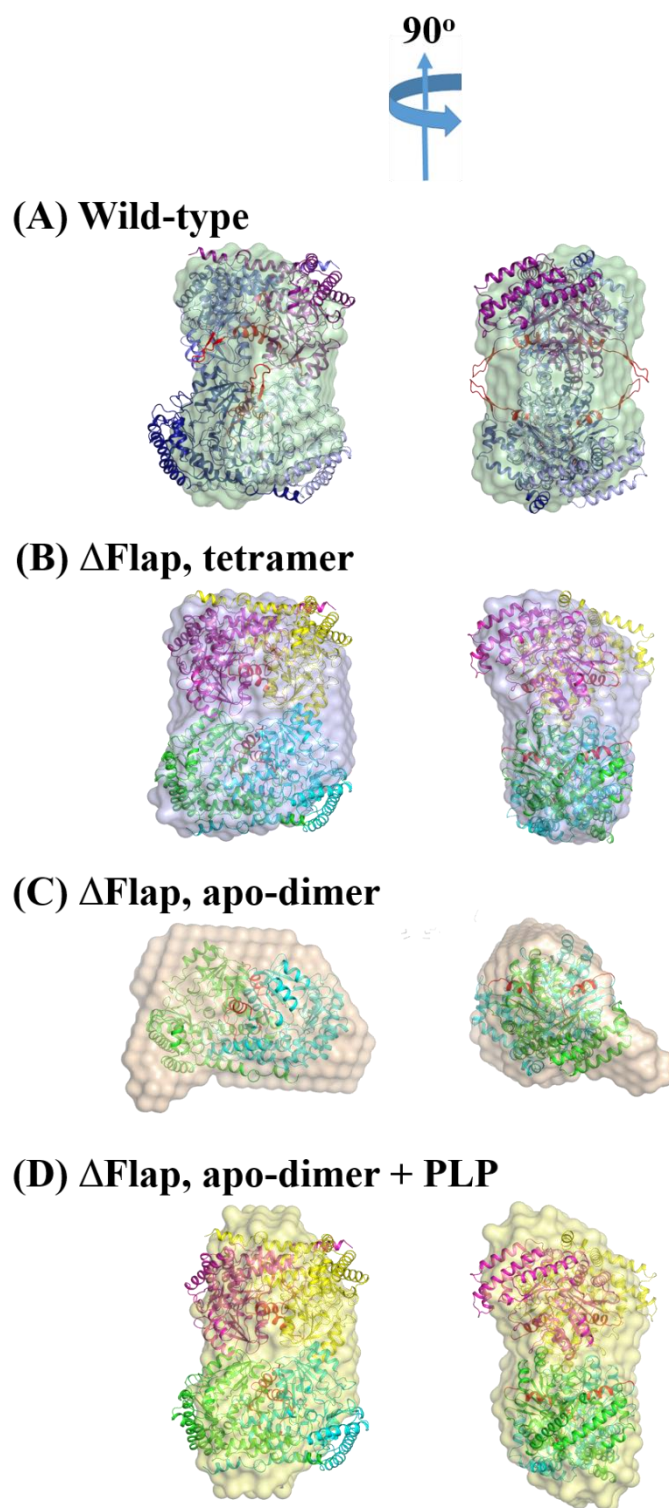

**Figure S3.** The *ab initio* models of the different oligomers of hcSHMT/ $\Delta$ flap compared to the wild-type derived from SAXS. (A) wild-type holo-tetramer, (B)  $\Delta$ flap holo-tetramers, (C)  $\Delta$ flap apo-dimer and (D) PLP-reconstituted tetramer after addition of PLP to the  $\Delta$ flap apo-dimer.

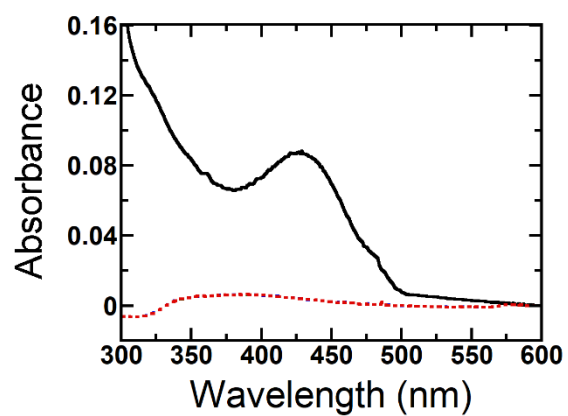

**Figure S4. Absorption spectra of released PLP (dotted line) and hcSHMT/ $\Delta$ flap holo-tetramer (black solid line) to determine the equilibrium binding constant.** The  $K_d$  of PLP was determined to be  $0.228 \pm 0.005 \mu\text{M}$ . The experiments were done in triplicate.

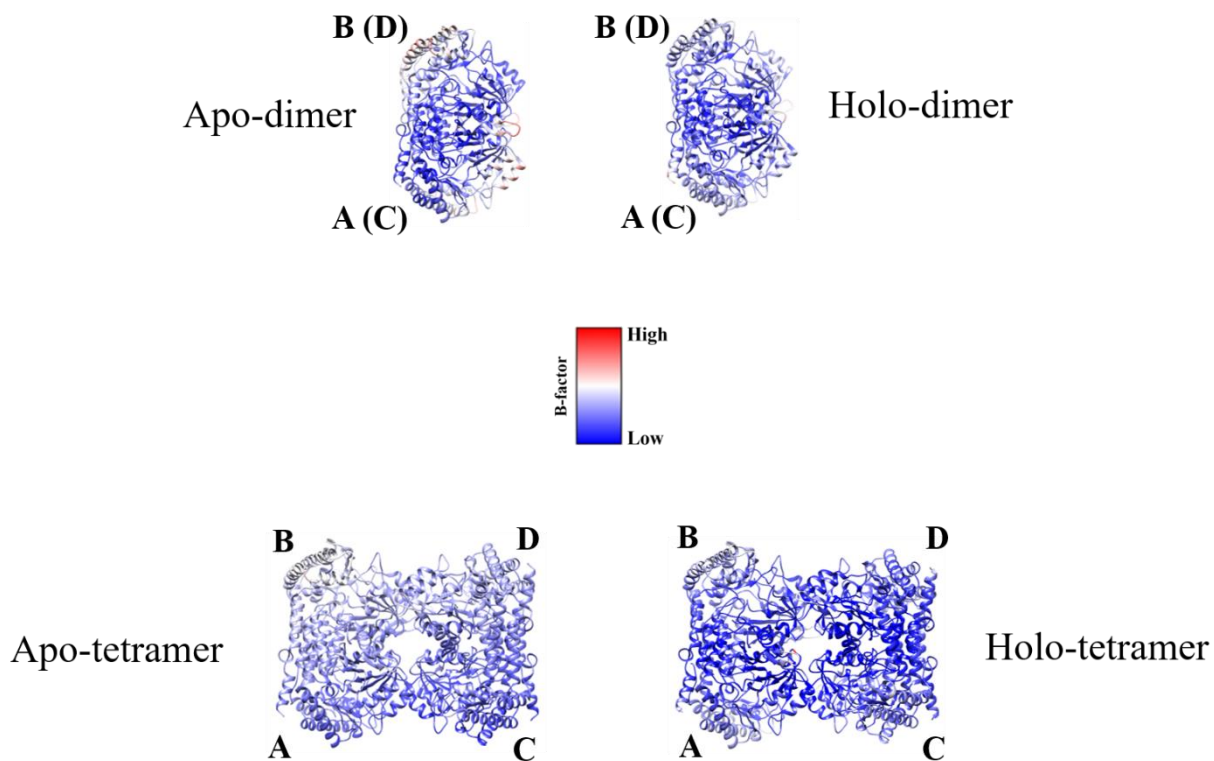

**Figure S5. Molecular dynamics simulation of apo/olo forms of the dimer and tetramer of wild-type hcSHMT.** The MD simulation results for the wild-type indicated that the thermal motion of the apo and holo forms of the dimer and tetramer of the wild-type were similar. This suggests the presence of tightly-packed domains in all oligomeric states of the wild-type, even though the obligate tetramer is the only form found in nature for the wild-type.

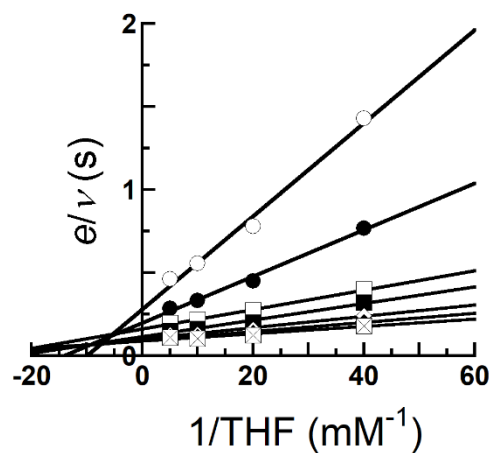

**Figure S6. A Dalziel plot of the two-substrate kinetics of the hcSHMT/ $\Delta$ flap reaction at pH 7.5.** A double-reciprocal plot of the initial velocities *versus* various concentrations of THF (0.025-0.2 mM) at various fixed L-serine concentrations (0.1-6.4 mM). A pattern of intersecting lines of a double-reciprocal plot indicates a ternary-complex kinetics of the hcSHMT/ $\Delta$ flap reaction.



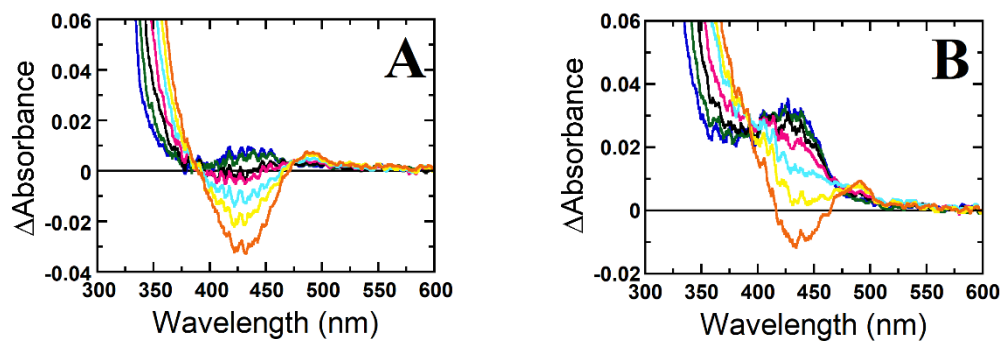

**Figure S7.** The difference spectra for the binding reactions of the (A) hcSHMT/ $\Delta$ flap and (B) wild-type with THF at pH 7.5.

### 3. Supplemental MD movies with legends

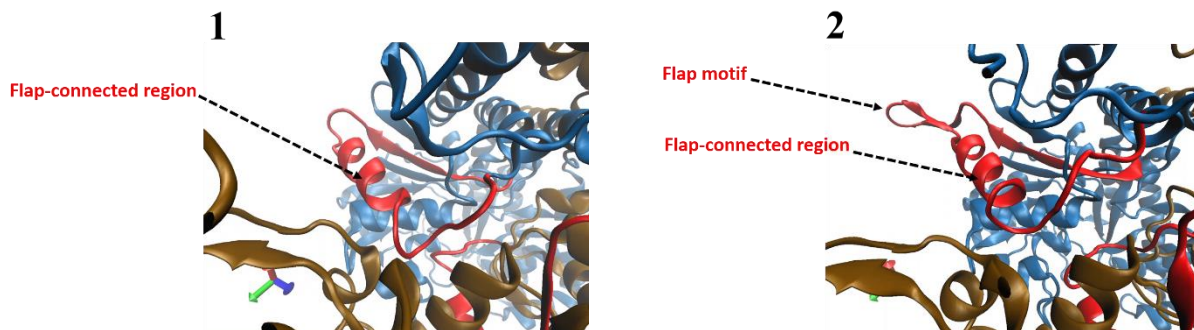

**Movies 1 and 2. A graphical representation of a 100-ns MD simulation of the hcSHMT/ $\Delta$ flap (1) and wild-type (2) dimers in the presence of THF and PLP-Ser Schiff base. The movies 1 and 2 show protein dynamic and a conformational change of the flap-connected region with the ligands omitted. The flap-connected region is highly conformational dynamic in the hcSHMT/ $\Delta$ flap compared to the wild-type.**

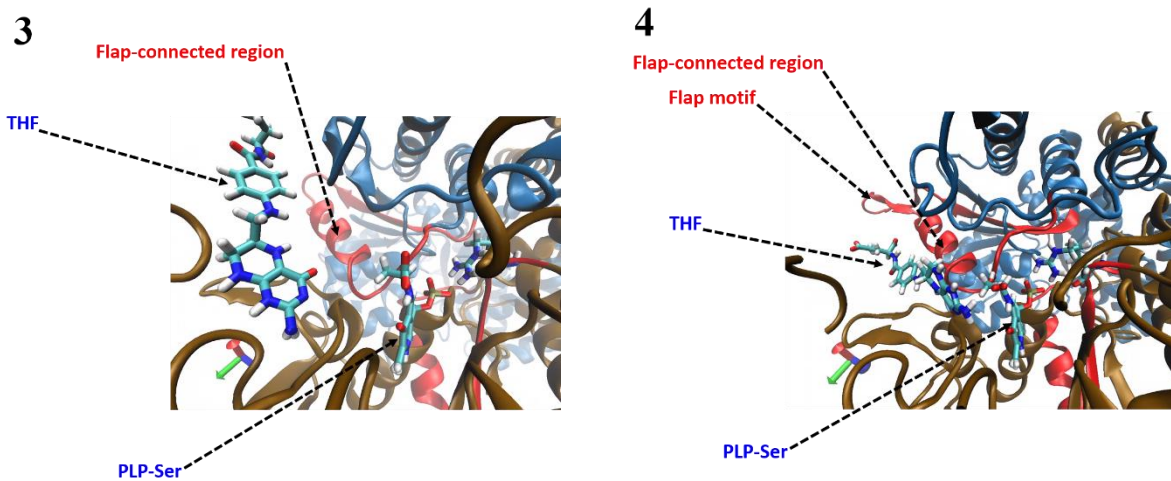

**Movies 3 and 4. A graphical representation of a 100-ns MD simulation of the hcSHMT/ $\Delta$ flap (3) and wild-type (4) dimers in the presence of THF and PLP-Ser Schiff base. The movie 3 shows that THF can be easily released from the hcSHMT/ $\Delta$ flap. While the movie 4 shows that the flap motif promotes retention of THF in the binding pocket of the wild-type.**
